# Supplementary material for: A non-noble metal Li, Mn co-doped Ni3S2 electrocatalyst for glycerol oxidation synergistic coupling to promote the hydrogen evolution reaction
Source: Royal Society of Chemistry journal article supplement (doi:10.1039/d4nj03067b), 2024-01-01
Supplement: d4nj03067b1.pdf [file d4nj03067b1.pdf]

## Supporting Information

### **Non-noble metal Li, Mn co-doped Ni<sub>3</sub>S<sub>2</sub> electrocatalyst for glycerol oxidation synergistic coupling to promote hydrogen evolution reaction**

**Qingtao Wang<sup>a,\*</sup>, Xiaoling Zhou<sup>a</sup>, Hanbin Jin<sup>a</sup>, Lulu Guo<sup>a</sup>, Yanxia Wu<sup>a</sup>, Shufang Ren<sup>b,\*</sup>**

a Key Laboratory of Eco-functional Polymer Materials of the Ministry of Education, Key Laboratory of Eco-environmental Polymer Materials of Gansu Province, College of Chemistry and Chemical Engineering, Northwest Normal University, Lanzhou 730070, China

b Key Laboratory of Evidence Science Research and Application of Gansu Province, Gansu University of Political Science and Law, Lanzhou 730070, China

Qingtao Wang: wangqt@nwnu.edu.cn

Shufang Ren: rsf@gsupl.edu.cn

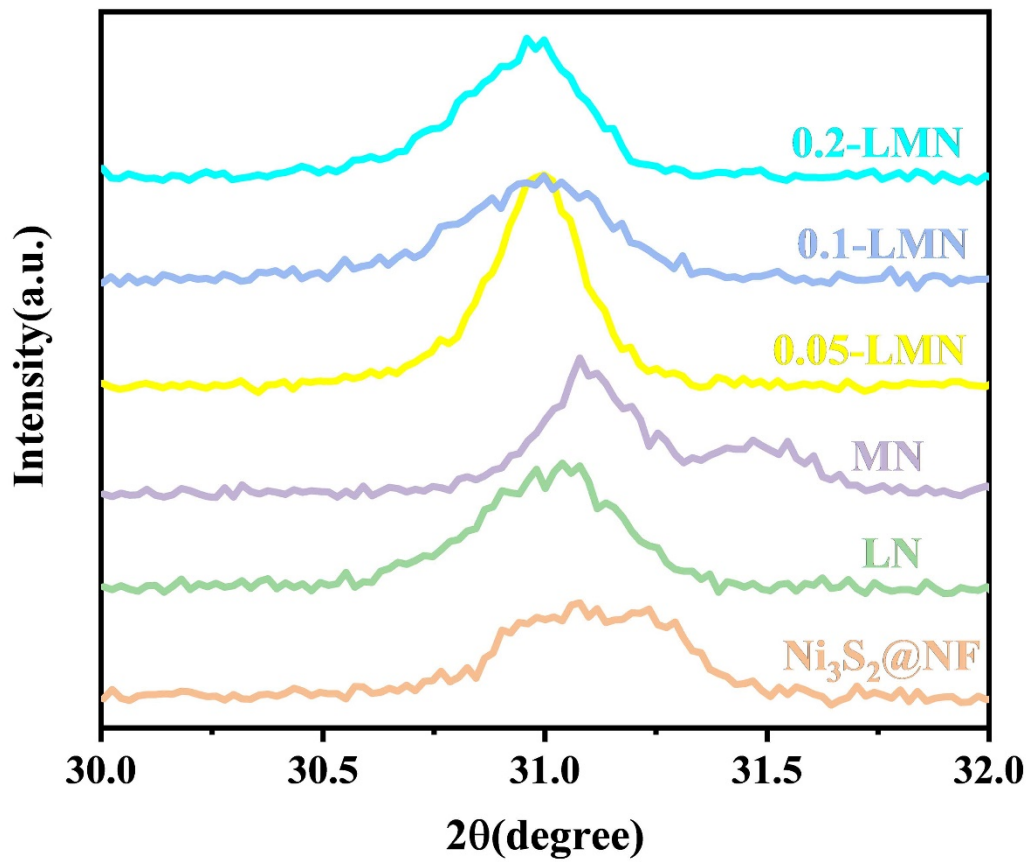

Fig. S1 n-LMN, LN, MN, and Ni<sub>3</sub>S<sub>2</sub>@NF highest diffraction peak angle shift.

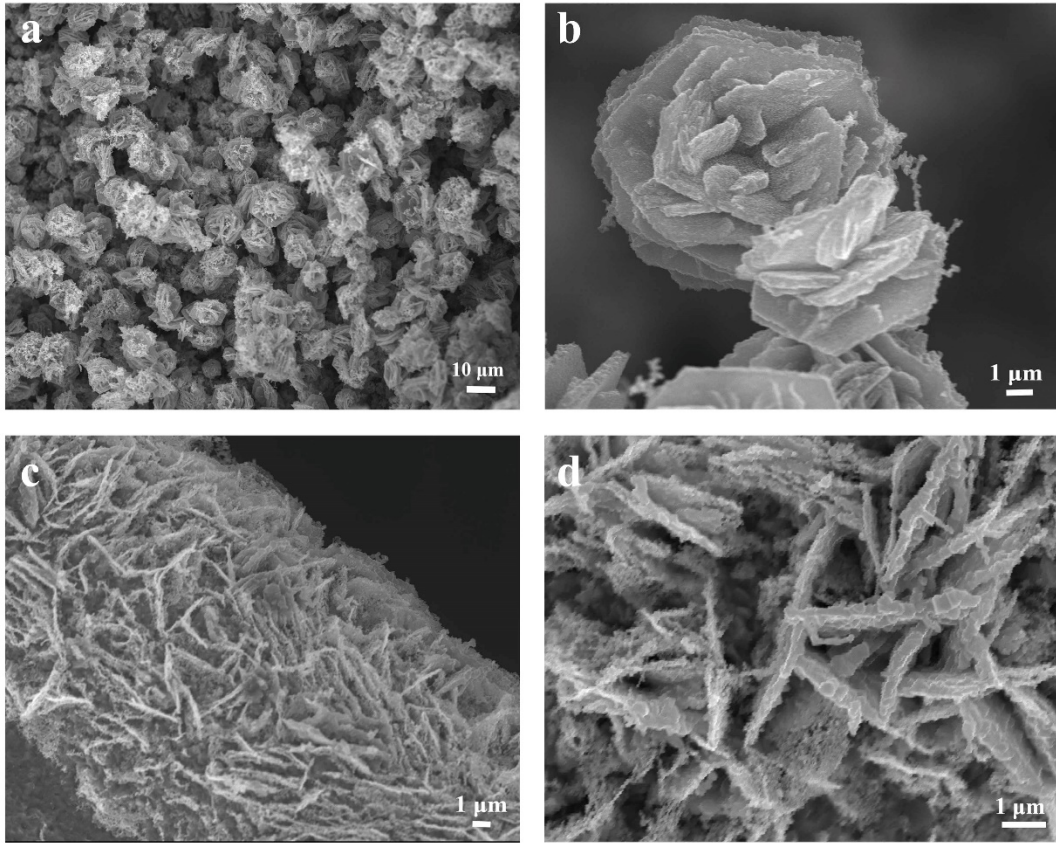

Fig. S2 The SEM images of a, b MN and c, d LN at different multiples were obtained.

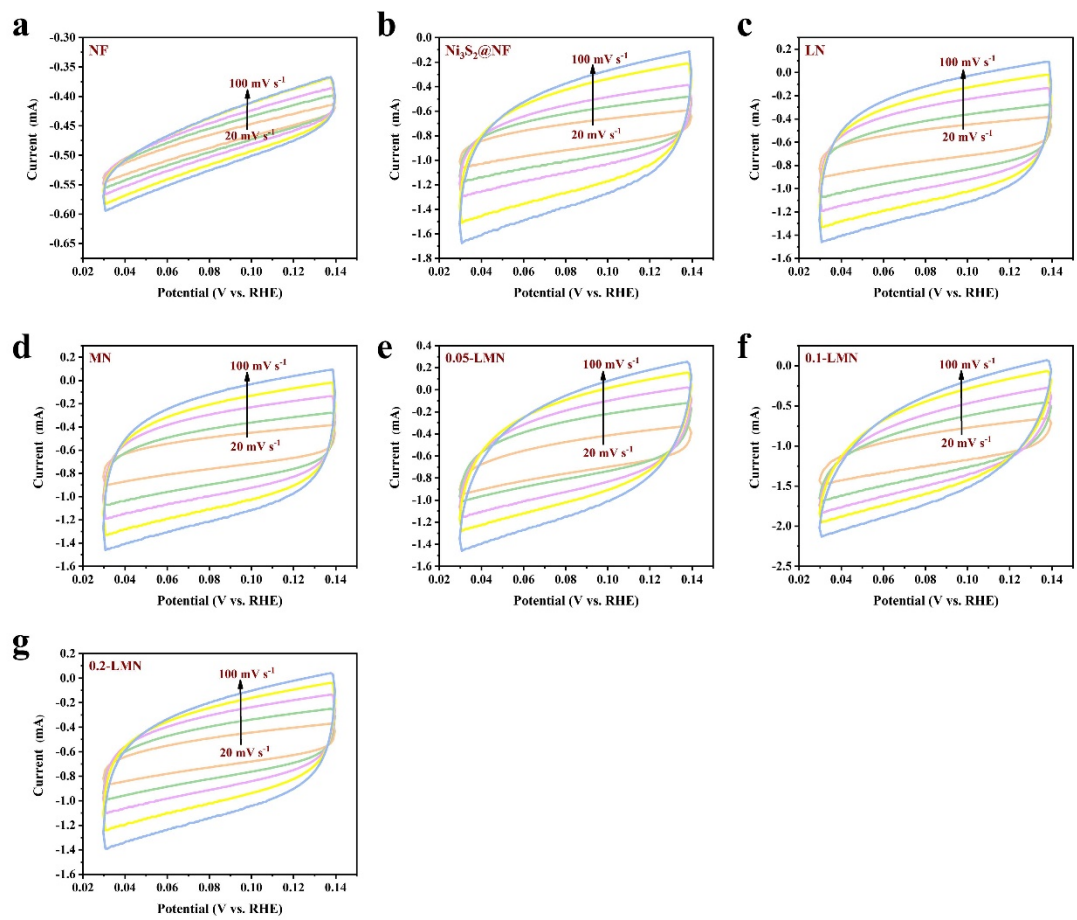

Fig. S3 Cyclic voltammetry curves of different materials between 0.03–0.138 V vs. RHE.

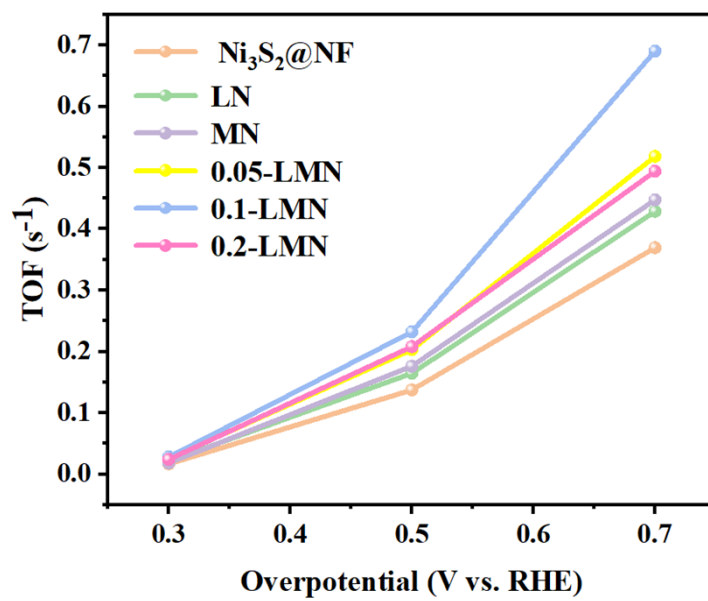

Fig. S4 The TOF of HER in Ni<sub>3</sub>S<sub>2</sub>@NF, LN, MN, 0.05-LMN, 0.1-LMN, and 0.2-LMN at different overpotentials.

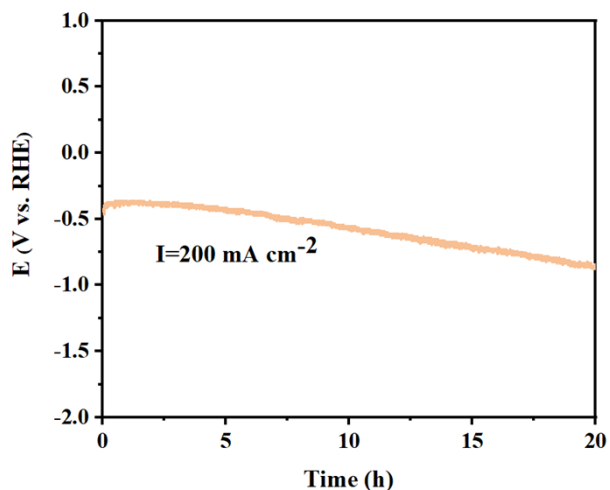

Fig. S5 The stability of 0.1-LMN catalyzed HER at a current density of 200 mA cm<sup>-2</sup>.

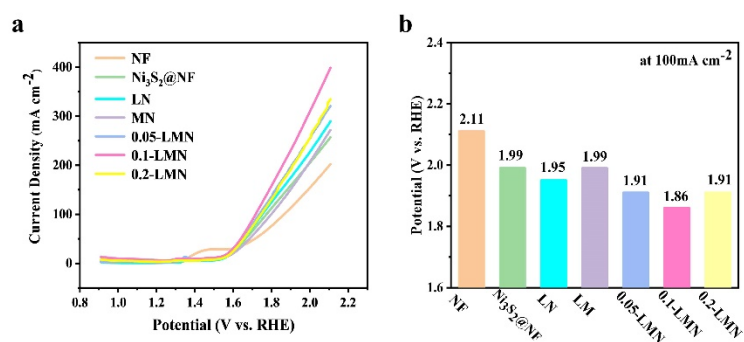

Fig. S6 The (a) LSV curve of OER catalyzed by different materials; (b) Overpotential comparison at a current density of 100 mA cm<sup>-2</sup>.

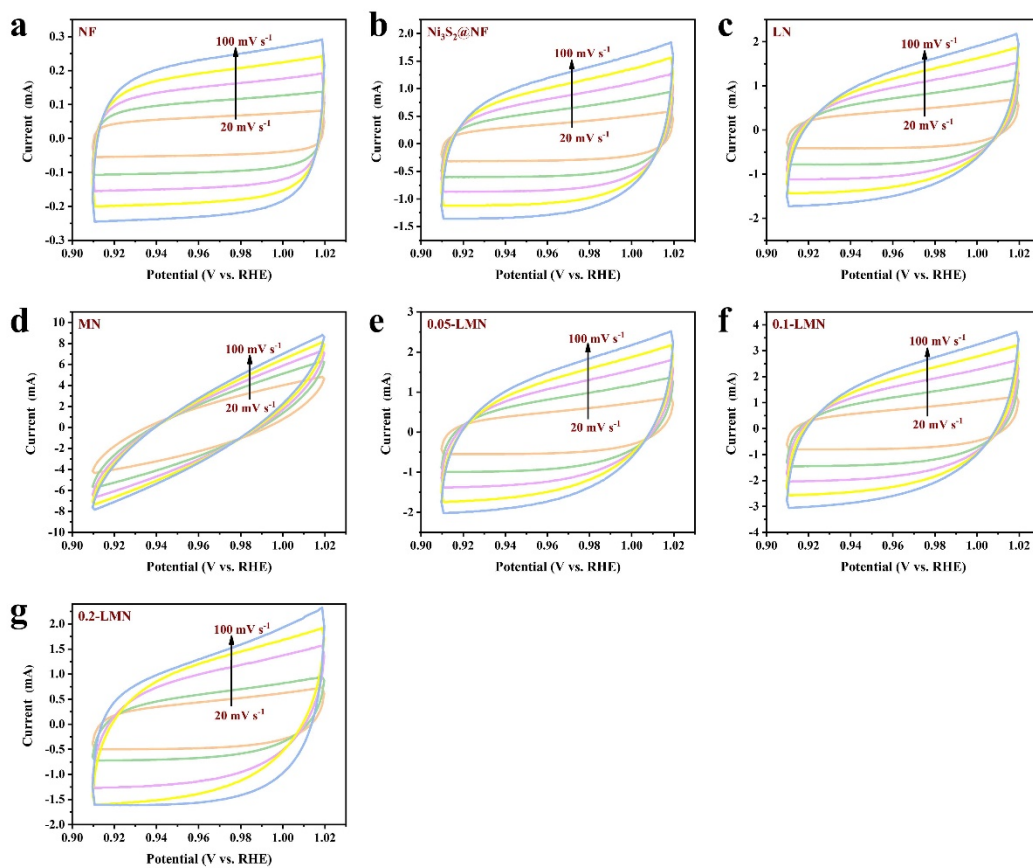

Fig. S7 Cyclic voltammetry curves of different materials between 0.909–1.019 V vs. RHE.

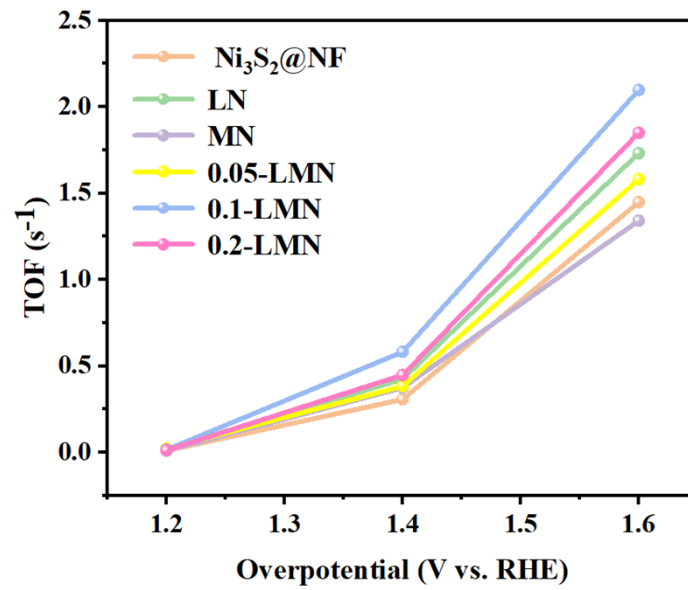

Fig. S8 The TOF of GOR in Ni<sub>3</sub>S<sub>2</sub>@NF, LN, MN, 0.05-LMN, 0.1-LMN, and 0.2-LMN at different overpotentials.



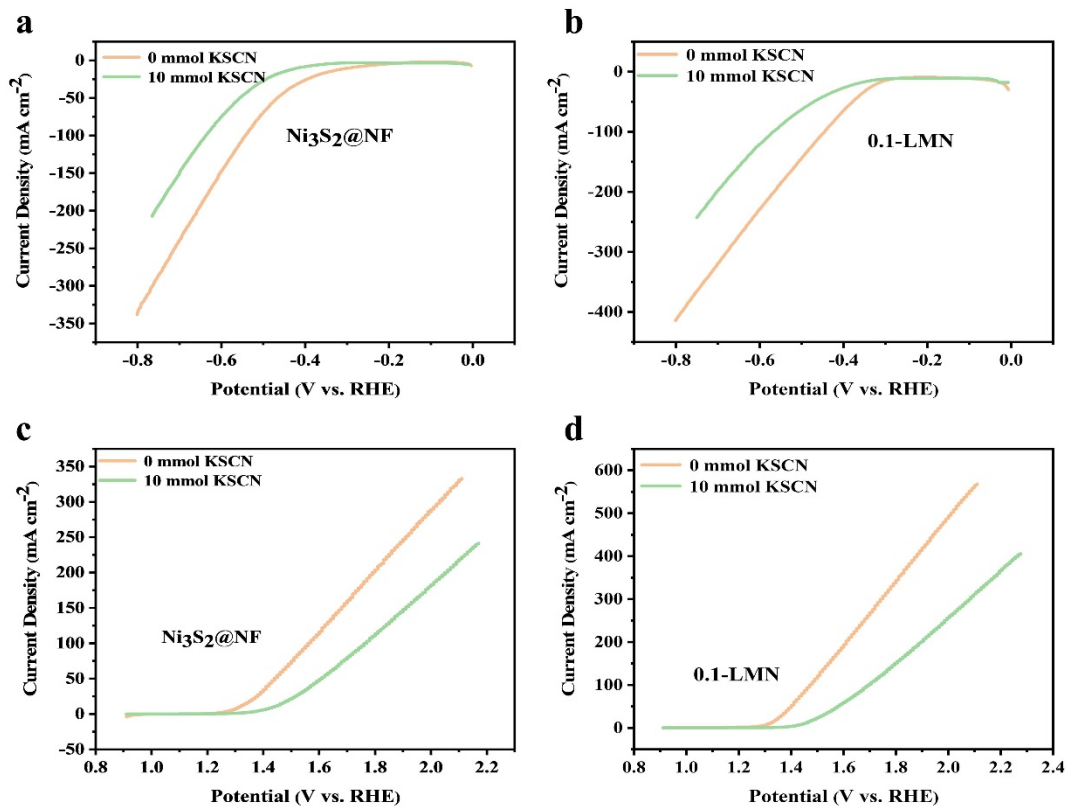

Fig. S9 The electrocatalytic performance of  $\text{Ni}_3\text{S}_2@\text{NF}$  and 0.1-LMN before and after poisoning test.

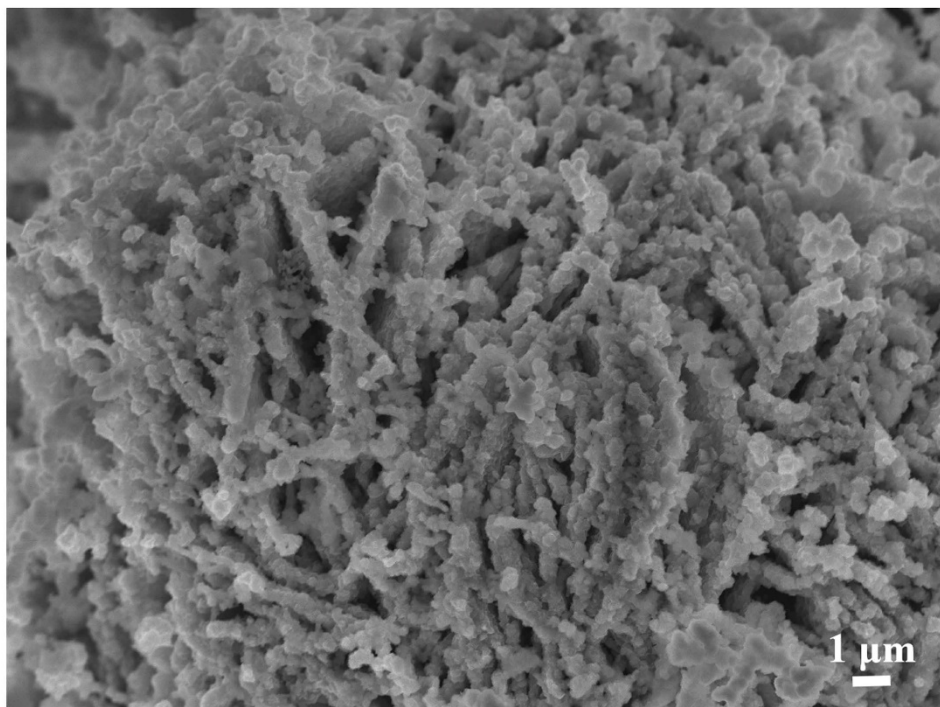

Fig. S10 SEM image of 0.1-LMN after long-term reaction.

Table S1 compares with other non-noble metal HER catalysts.

| Catalyst                                             | Electrolyte                          | $\eta_{10}$ (V vs.RHE) | Reference |
|------------------------------------------------------|--------------------------------------|------------------------|-----------|
| This Work                                            | 1.0 M KOH                            | 0.131                  |           |
| CoSe <sub>2</sub> /c-CoP                             | 0.5 M H <sub>2</sub> SO <sub>4</sub> | 0.127                  | [1]       |
| Co <sub>12</sub> @Ni <sub>3</sub> S <sub>2</sub> /NF | 1.0 M KOH                            | 0.297                  | [2]       |
| NiCo <sub>2</sub> S <sub>4</sub> NW/NF               | 1.0 M KOH                            | 0.260                  | [3]       |
| THTNi 2DSP                                           | 0.5 M KOH                            | 0.574                  | [4]       |
| Ni-Co-S/Ni                                           | 1.0 M KOH                            | 0.371                  | [5]       |
| Ni <sub>3</sub> S <sub>2</sub><br>nanoparticles/CNTs | 1.0 M KOH                            | 0.480                  | [6]       |

Table S2 Comparison of stability of different materials.

| Catalyst                          | Electrolyte | Glycerol concentration | Settling time | Current/Current density | Initial potential | Terminal potential | Reference |
|-----------------------------------|-------------|------------------------|---------------|-------------------------|-------------------|--------------------|-----------|
| This Work                         | 1.0 M KOH   | 0.5 M                  | 20 h          | 200 mA cm <sup>-2</sup> | 1.54 V            | 1.912 V            |           |
| SnO <sub>2</sub> /CoS             | 1.0 M KOH   | 0.1 M                  | 3000 s        | 100 mA                  | 1.05 V            | 1.24 V             | [7]       |
| 1.097                             |             |                        |               |                         |                   |                    |           |
| NiO/NF                            | 1.0 M KOH   | 0.1 M                  | 15 h          | 10 mA cm <sup>-2</sup>  | 1.35 V            | 1.45 V             | [8]       |
| Ni <sub>3</sub> N/WO <sub>3</sub> | 1.0 M KOH   | 0.1 M                  | 24 h          | 10 mA cm <sup>-2</sup>  | 1.45 V            | 1.56 V             | [9]       |
| Pt <sub>SA</sub> -NiCo            | 1.0 M KOH   | 0.1 M                  | 24 h          | 10 mA cm <sup>-2</sup>  | 1.25 V            | 1.52 V             | [10]      |
| LDH/NF                            |             |                        |               |                         |                   |                    |           |
| CoNiCuM                           | 1.0 M KOH   | 0.1 M                  | 25 h          | 10 mA cm <sup>-2</sup>  | 1.21 V            | 1.26 V             | [11]      |
| nMo/CF                            |             |                        |               |                         |                   |                    |           |
| Ni-Mo-N/CFC                       | 1.0 M KOH   | 0.1 M                  | 11 h          | 10 mA cm <sup>-2</sup>  | 1.29 V            | 1.48 V             | [12]      |

## Reference

- [1] SHEN S, WANG Z, LIN Z, et al. Crystalline-Amorphous Interfaces Coupling of CoSe<sub>2</sub>/CoP with Optimized d-Band Center and Boosted Electrocatalytic Hydrogen Evolution [J]. *Advanced Materials*, 2022, 34(13).
- [2] TONG X, LI Y, PANG N, et al. Co-doped Ni<sub>3</sub>S<sub>2</sub> porous nanocones as high performance bifunctional electrocatalysts in water splitting [J]. *Chemical Engineering Journal*, 2021, 425.
- [3] D.N. Liu, Q. Lu, Y.L. Luo, X.P. Sun, A.M. Asiri, NiCo<sub>2</sub>S<sub>4</sub> nanowires array as an efficient bifunctional electrocatalyst for full water splitting with superior activity, *Nanoscale*, 7 (2015), 15122-15126.
- [4] DONG R, PFEFFERMANN M, LIANG H, et al. Large-Area, Free-Standing, Two Dimensional Supramolecular Polymer Single-Layer Sheets for Highly Efficient Electrocatalytic Hydrogen Evolution [J]. *Angewandte Chemie International Edition*, 2015, 54(41): 12058-63.
- [5] ZHANG D, HE W, ZHANG Z, et al. Structure-design and synthesis of Nickel Cobalt-Sulfur arrays on nickel foam for efficient hydrogen evolution [J]. *Journal of Alloys and Compounds*, 2019, 785: 468-74.
- [6] T.W. Lin, C.J. Liu, C.S. Dai, Ni<sub>3</sub>S<sub>2</sub>/carbon nanotube nanocomposite as electrode material for hydrogen evolution reaction in alkaline electrolyte and enzyme-free glucose detection, *Appl. Catal. B.*, 154 (2014), 213-220.
- [7] XIE X, ZHANG C, XIANG M, et al. SnO<sub>2</sub>/CoS<sub>1.097</sub> heterojunction as a green

electrocatalyst for hydrogen evolution linking to assistant glycerol oxidation [J]. *Green Chemistry*, 2023, 25(22): 9405-12.

[8] LI S, LIU D, WANG G, et al. Vertical 3D Nanostructures Boost Efficient Hydrogen Production Coupled with Glycerol Oxidation Under Alkaline Conditions [J]. *Nanomicro Lett*, 2023, 15(1): 189.

[9] WANG H, ZHAN W, JIANG S, et al. eterointerface-Rich Ni(3)N/WO(3) Hierarchical Nanoarrays for Efficient Glycerol Oxidation-Assisted Alkaline Hydrogen Evolution [J]. *ChemSusChem*, 2024: e202400624.

[10] YU H, WANG W, MAO Q, et al. Pt single atom captured by oxygen vacancy-rich NiCo layered double hydroxides for coupling hydrogen evolution with selective oxidation of glycerol to formate [J]. *Applied Catalysis B: Environmental*, 2023, 330.

[11] YAO H, WANG Y, ZHENG Y, et al. High-entropy selenides: A new platform for highly selective oxidation of glycerol to formate and energy-saving hydrogen evolution in alkali-acid hybrid electrolytic cell [J]. *Nano Research*, 2023, 16(8): 10832-9.

[12] LI Y, WEI X, CHEN L, et al. Nickel-molybdenum nitride nanoplate electrocatalysts for concurrent electrolytic hydrogen and formate productions [J]. *Nat Commun*, 2019, 10(1): 5335.
